# Supplementary material
Source: Springer Nature journal article supplement (https://www.springermedizin.de/resource/supplementary/12889_2012_5061_MOESM2_ESM.pdf/9496394)
Supplement: MOESM2 [file 9496394]

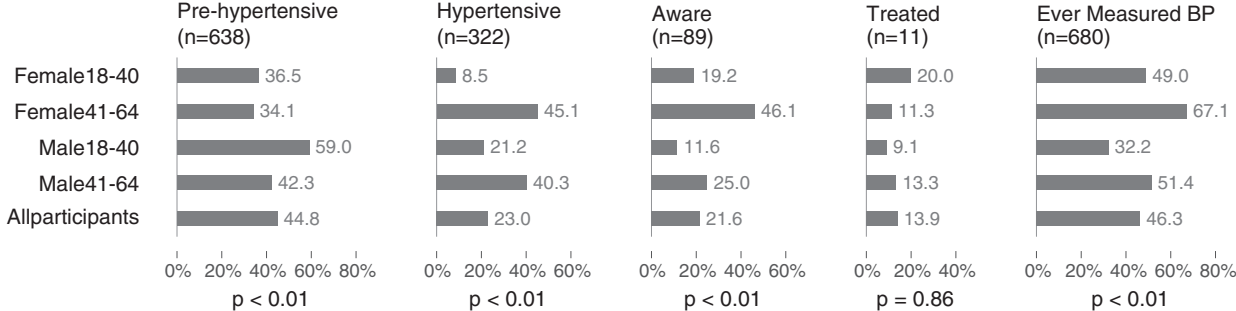

Note:

The denominator for awareness only included hypertensive individuals that had their blood pressure measured.

The denominator for treatment only included hypertensive individuals that were aware.
